# Supplementary material for: Exploiting directed self-assembly and disassembly for off-to-on fluorescence responsive live cell imaging
Source: Royal Society of Chemistry journal article supplement (doi:10.1039/d2ra06534g), 2022-01-01
Supplement: d2ra06534g1.pdf [file d2ra06534g1.pdf]

## Supplementary Information

### Exploiting Directed Self-Assembly and Disassembly for off-to-on Fluorescence Responsive Live Cell Imaging

Niamh Curtin,<sup>1</sup> Massimiliano Garre,<sup>1</sup> Jean-Baptiste Bodin,<sup>2</sup> Nicolas Solem,<sup>3</sup> Rachel Méallet-Renault,<sup>2</sup> Donal F. O'Shea<sup>1\*</sup>

<sup>1</sup> Department of Chemistry, RCSI, 123 St Stephen's Green, Dublin 2, Ireland.

<sup>2</sup> Université Paris-Saclay, Institut des Sciences Moléculaires d'Orsay (ISMO), CNRS, 91400 Orsay, France.

<sup>3</sup> Université Paris-Saclay, CNRS, Institut des Sciences Moléculaires d'Orsay, 91405, Orsay, France.

#### Contents

|                    |                                                                                 |            |
|--------------------|---------------------------------------------------------------------------------|------------|
| <b>Figure S1.</b>  | Stability of aqueous NP1-P <sub>188</sub> solutions                             | <b>S3</b>  |
| <b>Figure S2.</b>  | Physical and photophysical characteristics of M1-PS <sub>20</sub>               | <b>S3</b>  |
| <b>Figure S3.</b>  | Nanoparticle tracking analysis of NP1-P <sub>188</sub>                          | <b>S3</b>  |
| <b>Figure S4.</b>  | TEM images and sizing of NP1-P <sub>188</sub>                                   | <b>S4</b>  |
| <b>Figures S5.</b> | CLSM background emission analysis images                                        | <b>S5</b>  |
| <b>Figure S6.</b>  | Fixed uptake of NP1-P <sub>188</sub> into MDA MB-231 cell                       | <b>S6</b>  |
| <b>Figure S7.</b>  | Increase in lipid droplets visible as NP1-P <sub>188</sub> up taken into cell   | <b>S6</b>  |
| <b>Figure S8.</b>  | Intra-cellular FLIM imaging of <b>1</b>                                         | <b>S7</b>  |
| <b>Figure S9.</b>  | Intra-cellular photostability of <b>1</b>                                       | <b>S8</b>  |
| <b>Figure S10.</b> | Optimisation of SRRF imaging parameters                                         | <b>S8</b>  |
| <b>Figure S11.</b> | Live SRRF imaging of lipid droplets                                             | <b>S9</b>  |
| <b>Figure S12.</b> | Co-incubation of Nile red and NP1-P <sub>188</sub> in cells                     | <b>S9</b>  |
| <b>Figure S13.</b> | CLSM image of fixed cell following treatment with NP1-P <sub>188</sub> for 24 h | <b>S10</b> |

|                    |                                                                                           |            |
|--------------------|-------------------------------------------------------------------------------------------|------------|
| <b>Figure S14.</b> | CLSM image of fixed starved cells following treatment with NP1-P <sub>188</sub> for 24 h  | <b>S10</b> |
| <b>Figure S15.</b> | CLSM 3D before and after addition of oleic acid to starved cell                           | <b>S11</b> |
| <b>Figure S16.</b> | CLSM image of starved cell treated with oleic acid to induce biogenesis of lipid droplets | <b>S12</b> |
| <b>Figure S17.</b> | CLSM image growth of lipid droplets from the endoplasmic reticulum                        | <b>S12</b> |
| <b>Figure S18.</b> | Investigation of NP micro-environment using pyrene                                        | <b>S13</b> |
| <b>Figure S19.</b> | Fluorescence lifetime of NP1-P <sub>188</sub> and of <b>1</b> in chloroform               | <b>S14</b> |
| <b>Figure S20.</b> | Aggregation study of <b>1</b> in THF/water                                                | <b>S15</b> |
| <b>Movie S1:</b>   | Figure 6 video                                                                            |            |
| <b>Movie S1A:</b>  | Figure 6 duplicate experiment                                                             |            |
| <b>Movie S2:</b>   | SI Figure S6A video                                                                       |            |
| <b>Movie S2A:</b>  | SI Figure S6B video                                                                       |            |
| <b>Movie S3:</b>   | Figure 7A video                                                                           |            |
| <b>Movie S3A:</b>  | Figure 7A full FOV video                                                                  |            |
| <b>Movie S3B:</b>  | Figure 7A alternative FOV video                                                           |            |
| <b>Movie S3C:</b>  | Figure 7A duplicate experiment video                                                      |            |
| <b>Movie S4:</b>   | SRRF motion live                                                                          |            |
| <b>Movie S5:</b>   | SRRF 3D z-stack                                                                           |            |
| <b>Movie S6:</b>   | Figure 9 video                                                                            |            |
| <b>Movie S7:</b>   | Figure 10 video                                                                           |            |
| <b>Movie S7A:</b>  | Figure 10 full cell view video                                                            |            |
| <b>Movie 8:</b>    | Figure 11 video                                                                           |            |
| <b>Movie 8A:</b>   | Figure 11 duplicate experiment / Figure S17 video                                         |            |

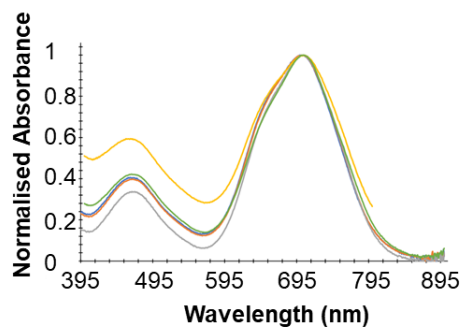

**Figure S1.** Stability of aqueous NP1-P<sub>188</sub> solutions. Absorption spectra of NP1-P<sub>188</sub> (5 μM) taken 4 (blue), 7 (orange), 17 (grey), 27 and 44 (green) days post synthesis.

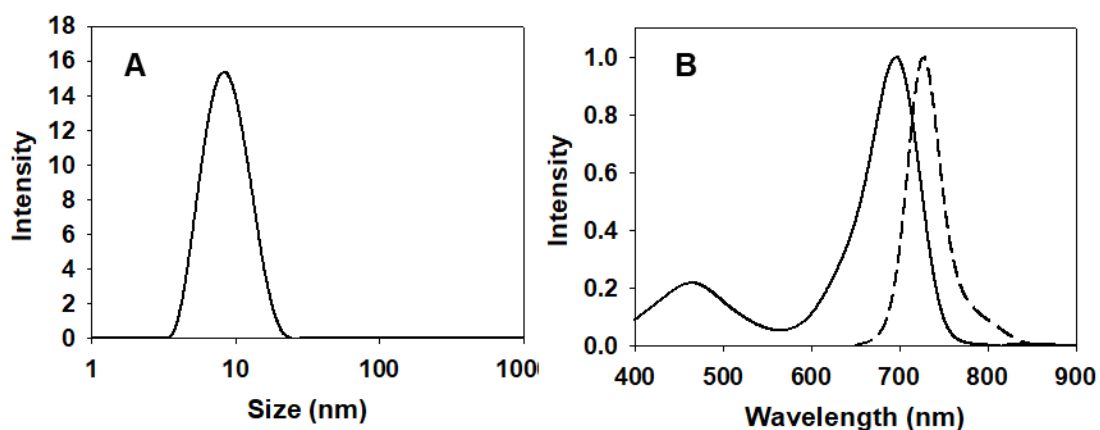

**Figure S2.** Physical and photophysical characteristics of M1-PS<sub>20</sub>. (A) DLS trace of M1-PS<sub>20</sub> (5 μM) at 25 °C (B) Absorbance (black) and emission (black dashed) of M1-PS<sub>20</sub> (5 μM)

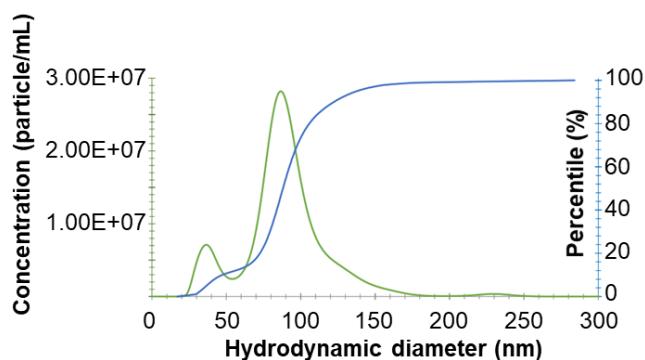

**Figure S3.** Nanoparticle tracking analysis of NP1-P<sub>188</sub> (green, conc of 1 and P<sub>188</sub>) solution, and the percentile of the population (blue). A total 136,098 particles analysed.

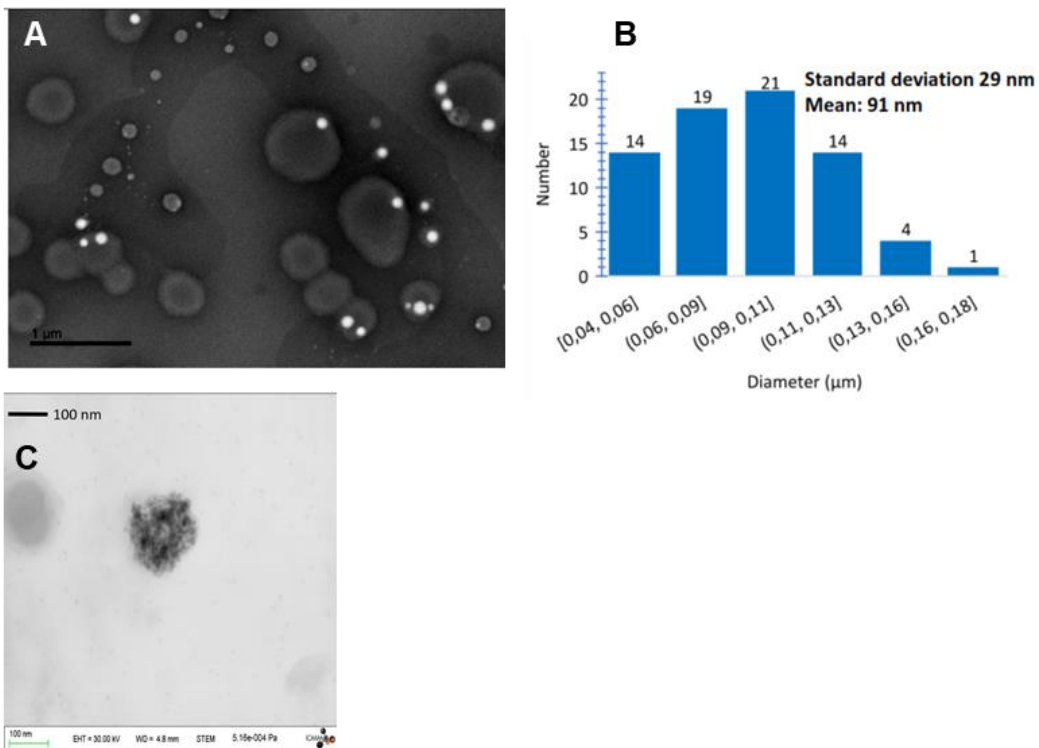

**Figure S4.** Scanning transmission electronic microscope (STEM) images of NP1-P<sub>188</sub> ( $P = 5,07 \cdot 10^{-4}$  Pa, tension = 30,0 kV). **(A)** After treatment with phosphotungstic acid (PTA) for negative staining. **(B)** Histogram of the different sizes measured in six different TEM images including the image shown, the total number of particles analysed was 73. **(C)** TEM image without staining showing an individual nanoparticle showing potential aggregates of **1** as darkened areas. Scale bar 100 nm.

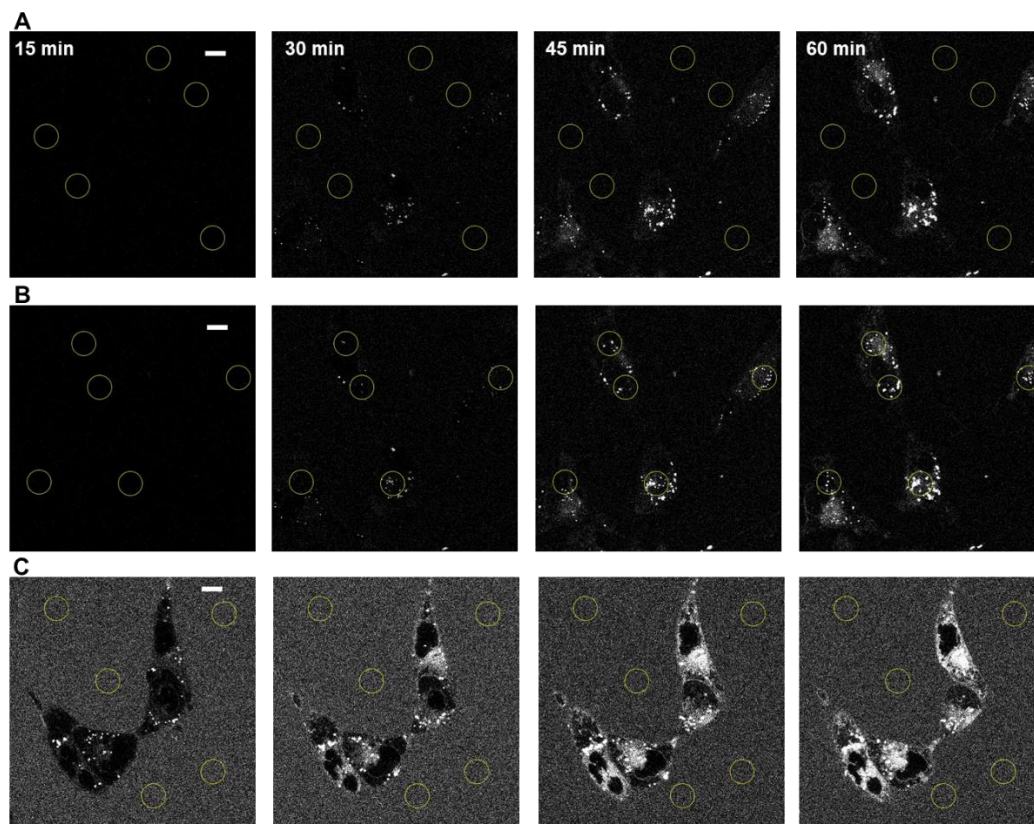

**Figure S5.** Time course of confocal imaging illustrating low background of NP1-P<sub>188</sub> in comparison to M1-PS<sub>20</sub>, yellow circles indicate extra and intra cellular areas used for intensity measurements, scale bar 10 μm. (A) NP1-P<sub>188</sub> extra-cellular circles (B) NP1-P<sub>188</sub> intra-cellular circles (C) M1-PS<sub>20</sub> extra-cellular circles

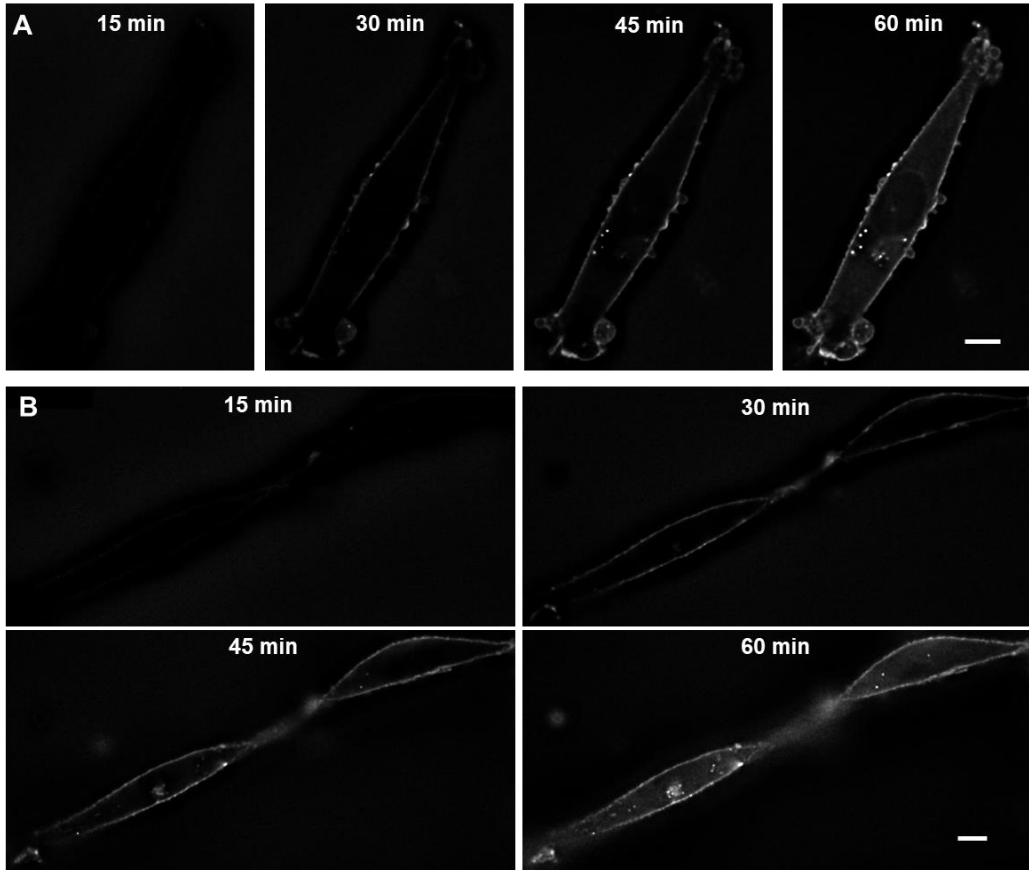

**Figure S6.** Widefield imaging (processed Huygens) of fixed MDA-MB 231 at 37 °C cells treated with NP1-P<sub>188</sub> at 15, 30, 45, 60 min time points showing staining of the plasma membrane in (A) and (B) duplicate experiment. See SI Movie S2 and S2A for video.

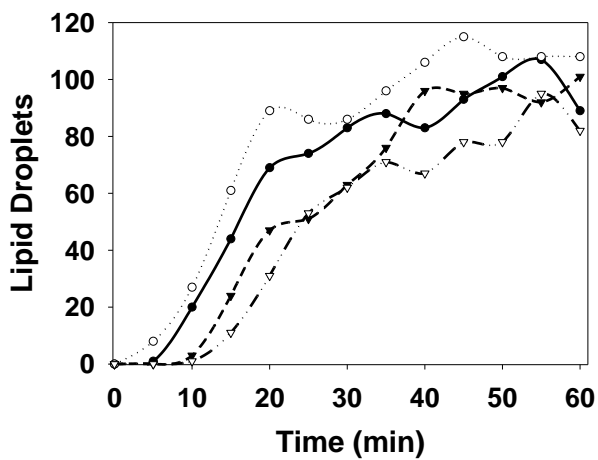

**Figure S7.** Graphed plot of four MDA-MB 231 cells showing the increase in number of LDs visible over 60 min following live cell treatment with NP1-P<sub>188</sub>.

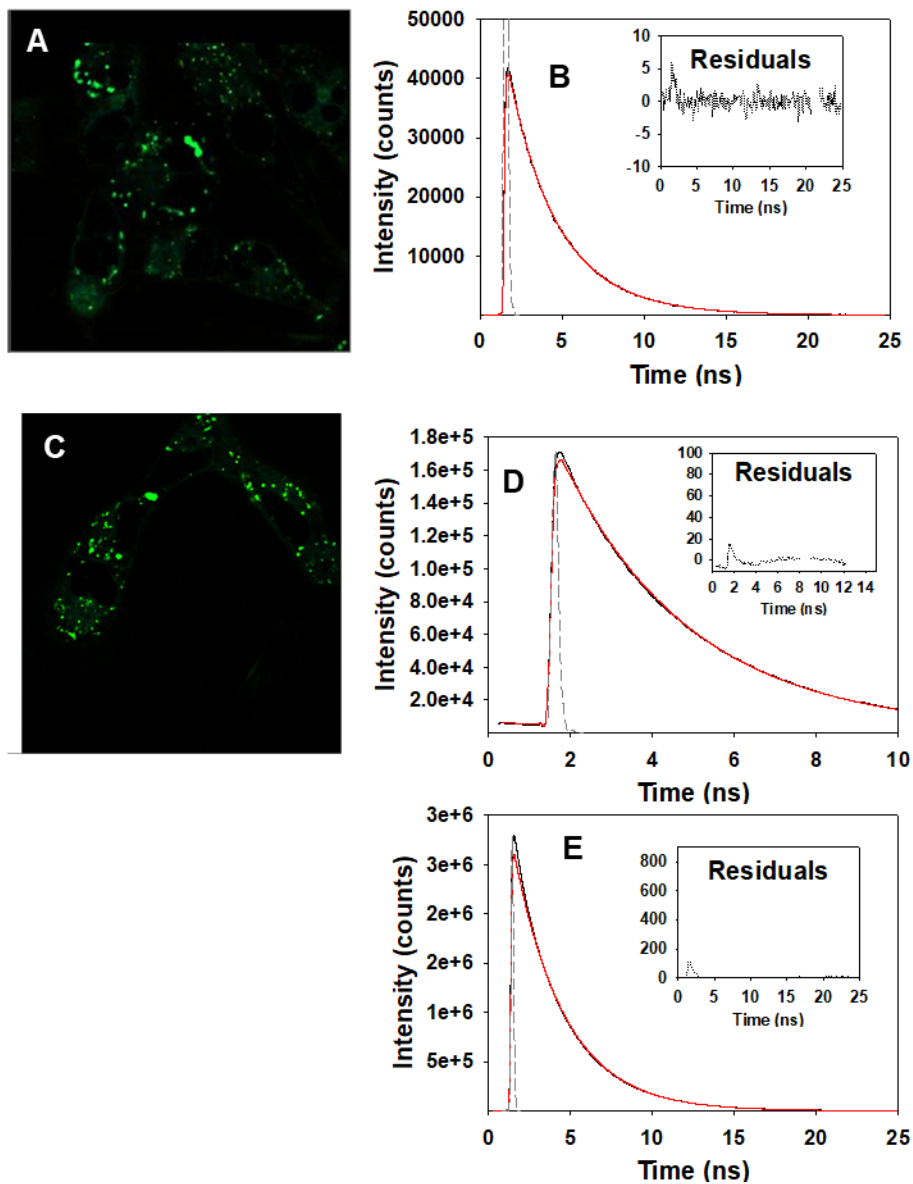

**Figure S8.** (A) FLIM imaging of LDs in live MDA-MB 231 cells 60 min following treatment with NP1-P<sub>188</sub>. (B) Mono-exponential fitted fluorescence lifetime decays from LDs (red trace fitted data, grey IRF), (C) Repeat experiment of FLIM imaging of LDs in live MDA-MB 231 cells 60 min following treatment with NP1-P<sub>188</sub> (D) Repeat experiment of mono-exponential fitted fluorescence lifetime decays from FOV (red trace fitted data grey IRF) (E) Mono-exponential fitted fluorescence decay of **1** in triolein solution (red trace fitted data, grey trace IRF)

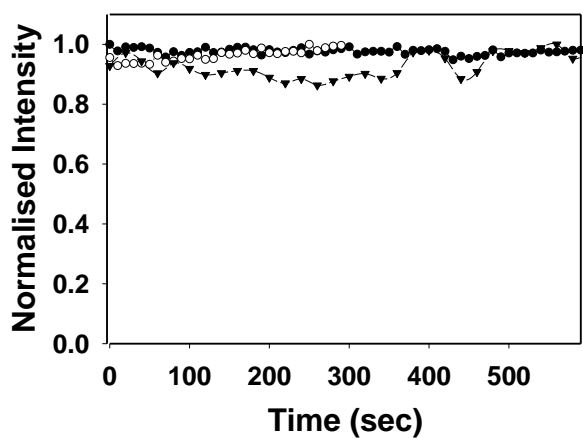

**Figure S9.** Stability demonstration of **1**. Normalised continual integrated fluorescence intensity from a three different cell FOVs during continuous imaging.

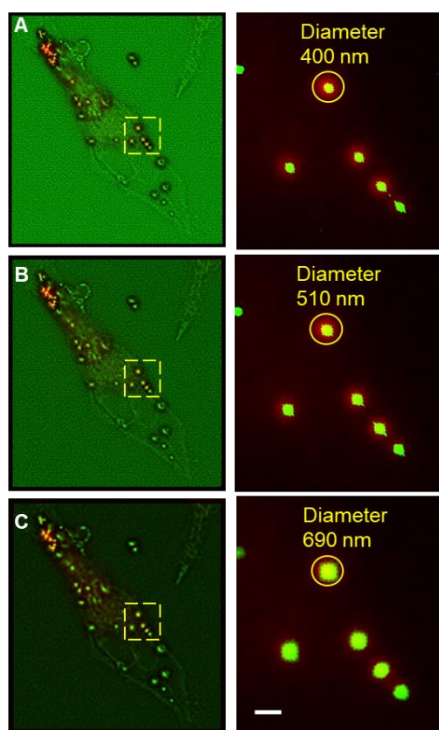

**Figure S10.** Optimization of Super resolution radial fluctuations (SRRF) imaging parameters using ring radius (A) 0.5, (B) 1 and (C) 2. Overlap of SRRF image (green) with original NIR image (red). Effect of ring radius parameter seen through changes in LD diameter, scale bar 1  $\mu\text{m}$



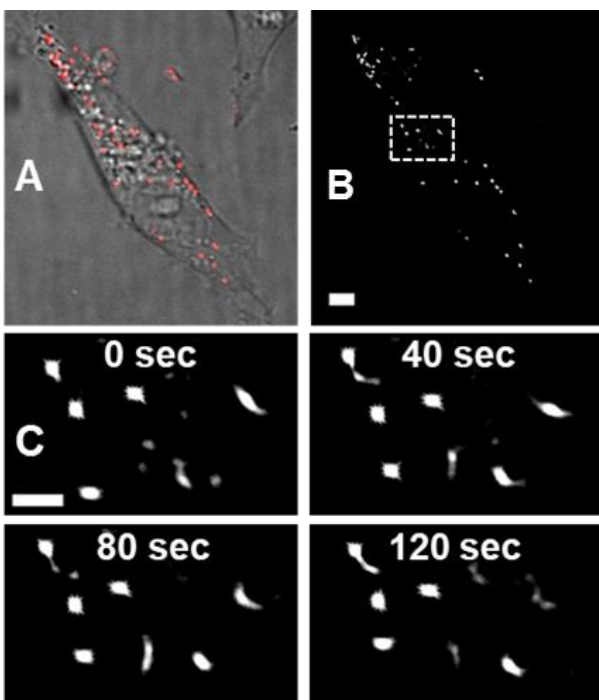

**Figure S11.** SRRF imaging of LDs in MDA-MB 231 cells, incubated with NP1-P<sub>188</sub> for 2 h. (A) DIC image with fluorescent LDs overlay shown in red. (B) Fluorescence image of LDs (white) stained by **1** following 2 h incubation with NP1-P<sub>188</sub>, scale bar 5  $\mu$ m. (C) Time course of SRRF imaging of live cells showing motion of LDs (white), scale bar 2  $\mu$ m. See SI Movie S4.

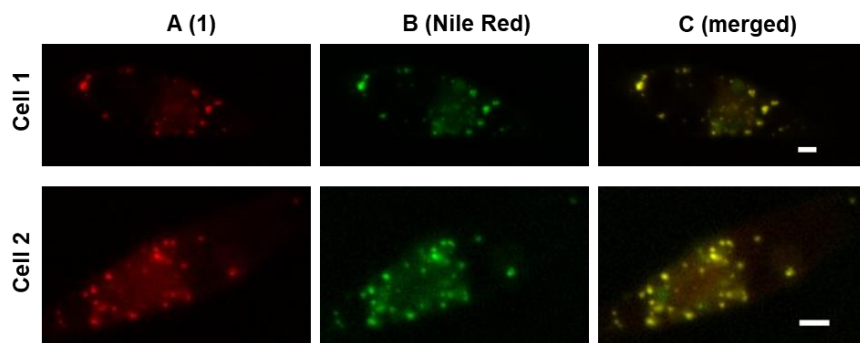

**Figure S12.** Widefield fluorescence images of cells co-incubated with (A) NP1-P<sub>188</sub> and (B) Nile Red for 1 h and fixed with 4% formaldehyde. (C) Merged images of **1** (red) and Nile Red (green) showing co-localisation (yellow) of fluorophores in LDs. Scale bar 5  $\mu$ m

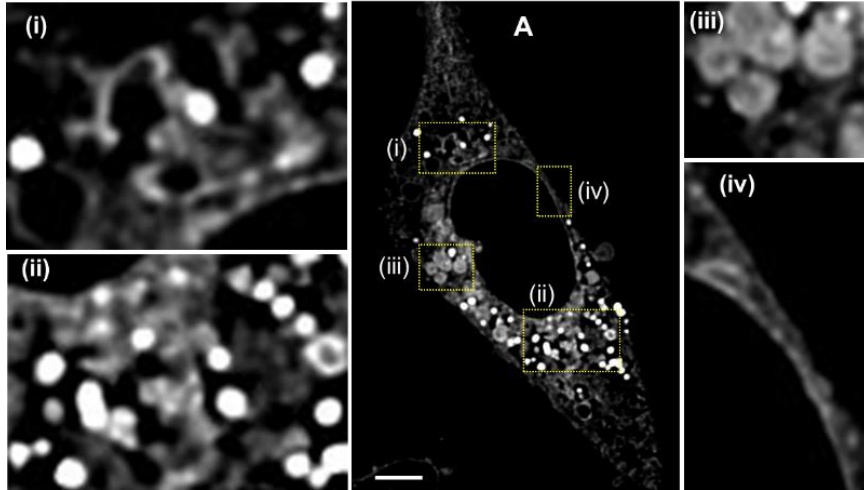

**Figure S13.** CLSM image showing an MDA-MB 231 fixed cell following 24 h incubation with NP1-P<sub>188</sub>. (A) Whole cell with fluorescence shown in white for clarity, scale bar 5  $\mu\text{m}$ , (i, ii) ER network with LDs, (iii) large vacuoles (iv) nuclear membrane

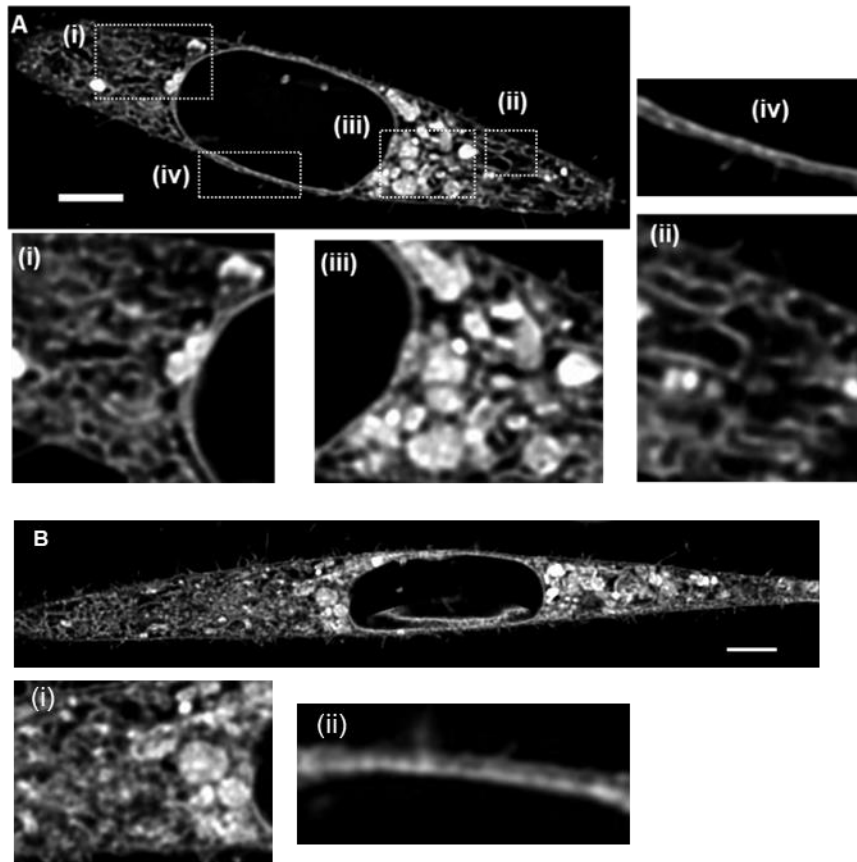

**Figure S14.** CLSM image of starved MDA-MB 231 fixed cells treated with NP1-P<sub>188</sub> for 24 h. (A) whole single cell view with labelled expansion areas. (i) and (ii) cell regions with few LDs and ER visible, (iii) secretory granules, (iv) nuclear membrane, scale bar 5  $\mu\text{m}$  (B) whole single

cell view with labelled expansion areas (i) ER and secretory granules (ii) nuclear membrane, scale bar 5  $\mu\text{m}$

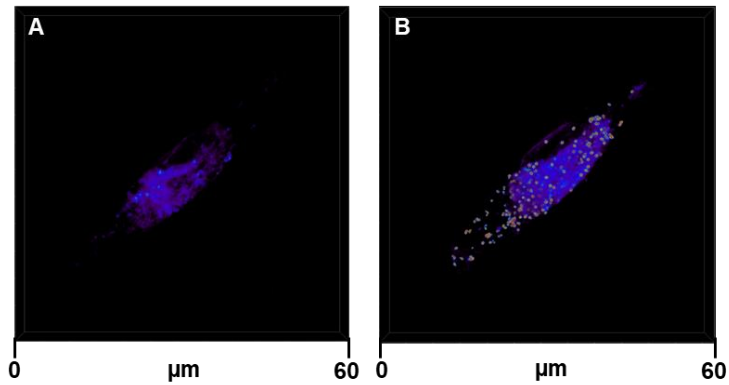

**Figure S15.** CLSM 3D image of starved live MDA-MB 231 cell treated with NP1-P<sub>188</sub> for 3h (A) before addition of oleic acid (B) after addition of oleic acid for 30 min

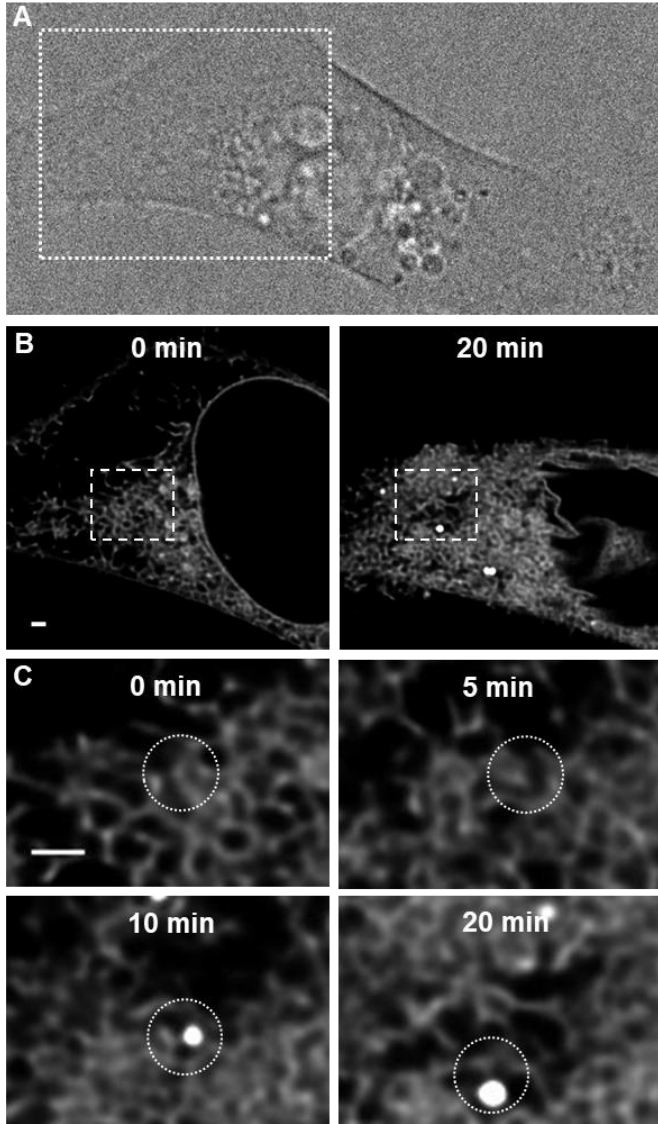

**Figure S16.** (A) DIC image of starved live MDA-MB 231 cell treated with NP1-P<sub>188</sub> for 3h, (B) CLSM image showing growth of LD seen following addition of oleic acid to media over 20 min (C) Expansion of box showing LD biogenesis from ER at 0, 5, 10, 20 min, scale bar 1  $\mu\text{m}$ . See SI Movie S8 for video.

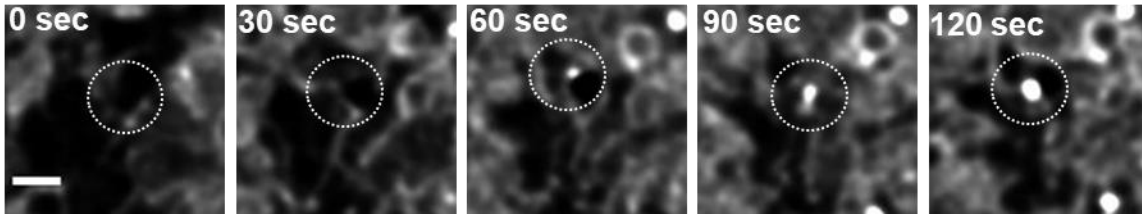

**Figure S17.** CLSM image showing growth of LD from ER following addition of oleic acid to media at 0, 30, 60, 90, and 120 sec, scale bar 1  $\mu\text{m}$ . See SI Movie S8A for video.

A

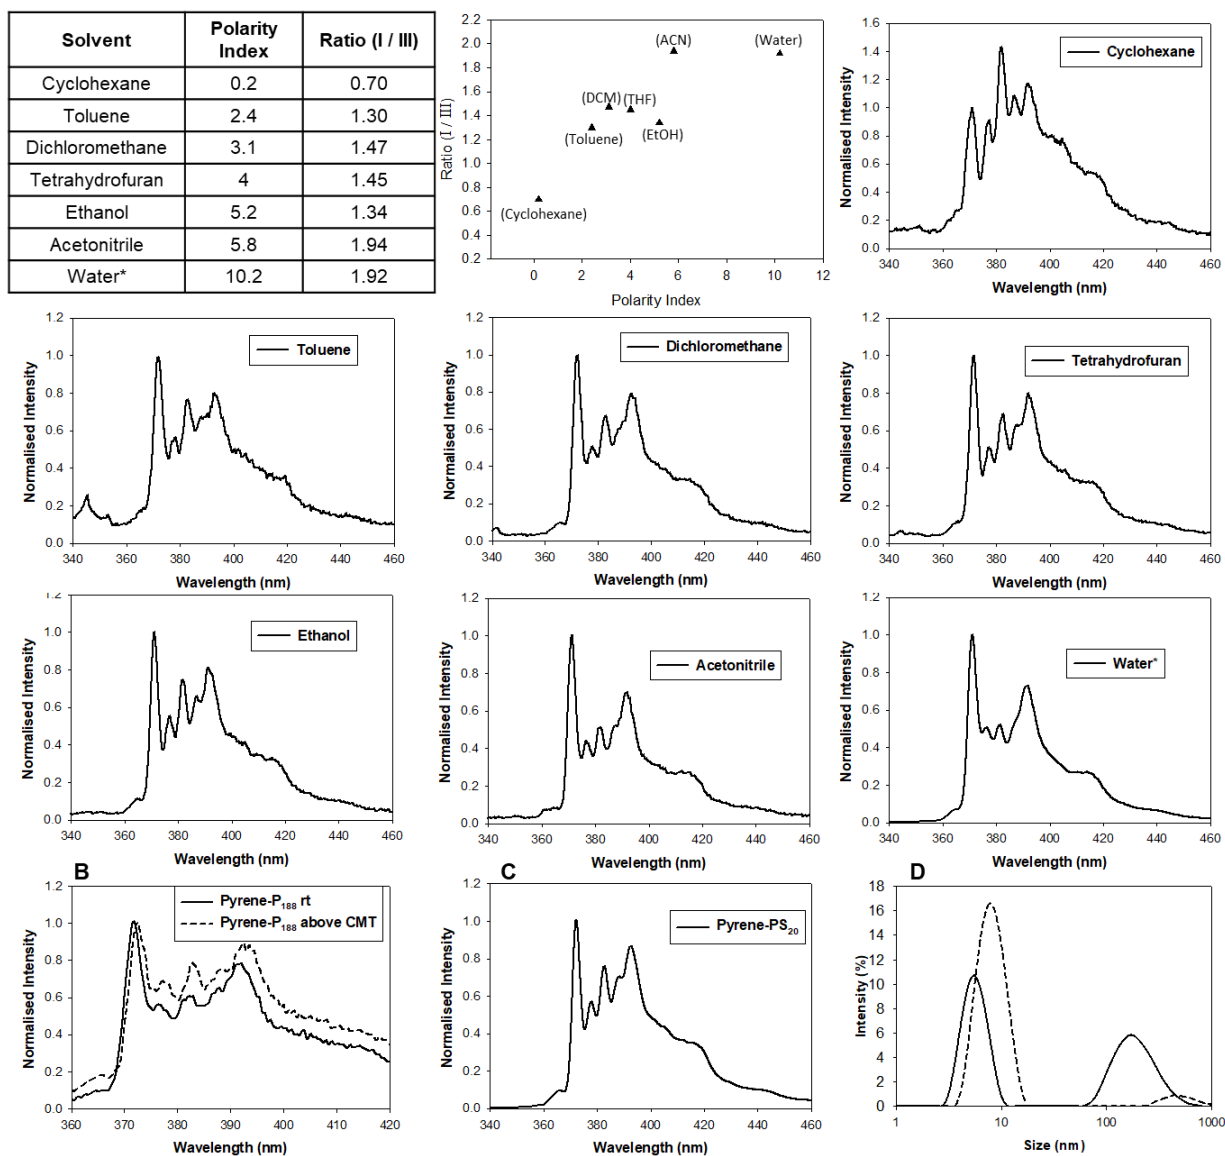

**Figure S18.** Investigation of NP micro-environment using pyrene (A) Emission spectra of pyrene (0.5  $\mu$ M) in different solvents used to create polarity table index to ratio of 1<sup>st</sup> to 3<sup>rd</sup> band (B) Emission NP-pyrene-P<sub>188</sub> (5  $\mu$ M, 1.18 mM) at rt and 65  $^{\circ}$ C (C) Emission pyrene-PS<sub>20</sub> (5  $\mu$ M , 8.14 mM) at rt (D) DLS of NP-pyrene-P<sub>188</sub> (solid) and pyrene-PS<sub>20</sub> (dashed) at 25  $^{\circ}$ C

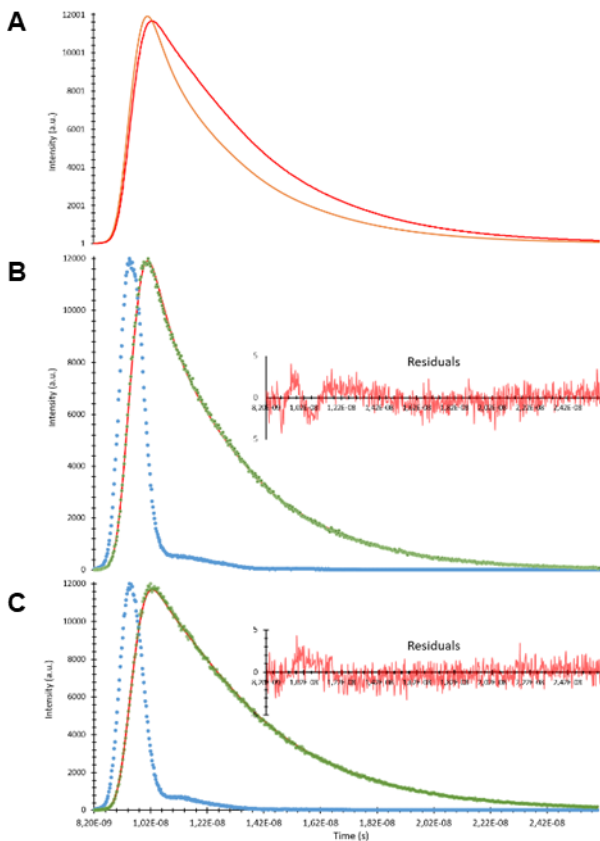

**Figure S19.** (A) Superposition of fitted curve of fluorescent decay of aqueous NP1-P<sub>188</sub> (5  $\mu$ M, 1.18 mM) using a bi-exponential fitting (orange) and of **1** (5  $\mu$ M) in CHCl<sub>3</sub> using a mono-exponential fitting (red), excitation at 667 nm, emission observed at 710 nm. (B) Fluorescent decay (green) of NP1-P<sub>188</sub> and the fitted curve (red). (C) Fluorescent decay (green) of **1** in CHCl<sub>3</sub> and the fitted curve (red).

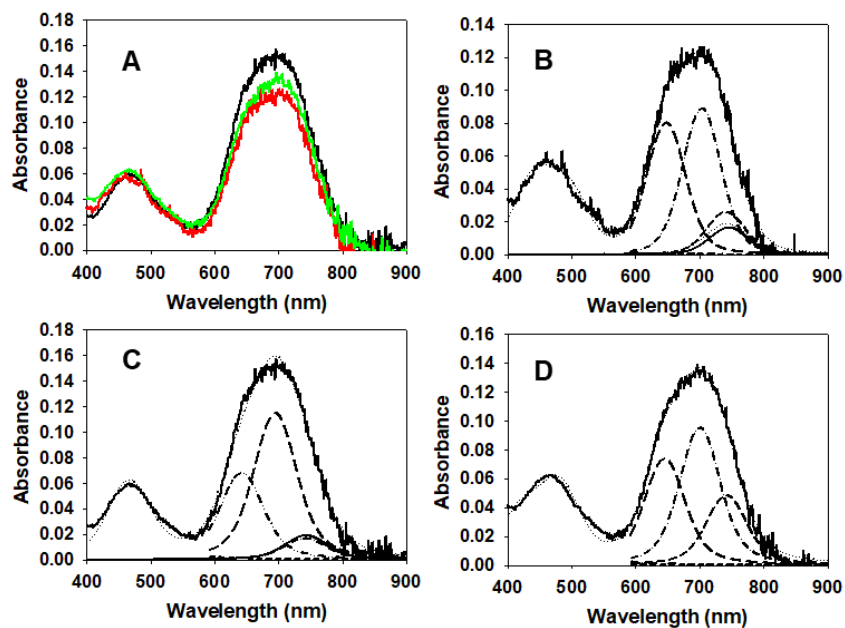

**Figure S20.** (A) Absorption bands of **1** after 60 min in THF/water 2:98 (black) 5:95 (red) 10:90 (green) (B) Voigt function peak fitting of **1** absorption band in THF/water 2:98 showing three contributing bands centred at 642, 695 ~ 742 nm (C) Voigt function peak fitting of **1** absorption band in THF water 5:95 showing three contributing bands centred at 648, 703 ~ 743 nm and (D) Voigt function peak fitting of **1** absorption band in THF/water 10:90 showing three contributing bands centred at 645, 700, 742 nm.
